# Supplementary material
Source: MDPI journal article supplement (https://www.mdpi.com/2075-163X/13/9/1128)
Supplement: s1 [file s1]

# Supplementary Material

## A Review on Removal of Iron Impurities from Quartz Mineral

Chunfu Liu <sup>1,2,\*</sup>, Weitao Wang <sup>1</sup>, Han Wang <sup>1</sup>, Chenyu Zhu <sup>1</sup> and Bao Ren <sup>1</sup>

<sup>1</sup> School of Materials Science and Engineering, Anhui University of Science and Technology, Huainan 232001, China; wanweitao2@163.com (W.W.); whan0202@163.com (H.W.); zcy05080515@163.com (C.Z.); renbao1367217462@gmail.com (B.R.)

<sup>2</sup> Anhui Engineering Research Center for Coal Clean Processing and Carbon Emission Reduction, Anhui University of Science and Technology, Huainan 232001, China

\* Correspondence: chfuliu@aust.edu.cn

The phase transition of quartz with temperature is shown as Figure S1.

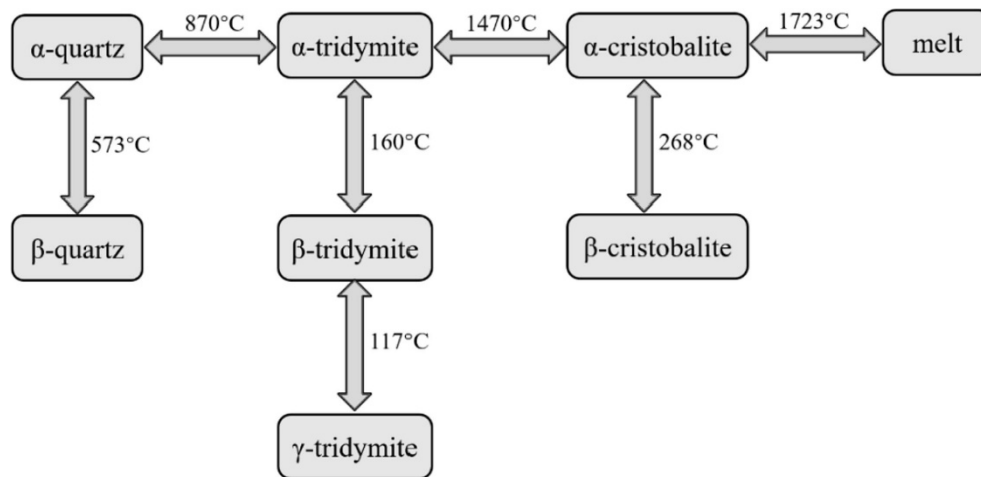

**Figure S1.** The phase transition of quartz.

### Reference

[1] Pan, X., et al., Resource, characteristic, purification and application of quartz: a review. Minerals Engineering, 2022. 183.
